# Supplementary material for: Dynamic Intergenerational Support and Anxiety-Depression in Aging: Insights from Latent Transitions to Symptom Networks
Source: Research Square preprint supplement (doi:10.21203/rs.3.rs-6826412/v1), 2025-06-19
Supplement: Supplementary file 1 [file 9fd5ffc06d06f56d68672c02.docx]

Supplementary Material

Supplementary figure and table legends

Table S1. Detailed coding information for intergenerational support patterns among Chinese older adults based on the original CLHLS questionnaire.

Figure S1. Distribution of response frequencies to the seven intergenerational support items for Class 1 and Class 2 at T1 (2014) and T2 (2018).

Figure S2. Correlations among item scores of the CESD-10 and GAD-7 scales among Chinese older adults at T2 (2018).

Table S2. Correlation matrix of the CESD-10 and GAD-7 items

Table S3: The complete weighted adjacency matrix for Transition Pattern 1 (left) and Transition Pattern 4 (right).

Figure S3. Stability of node expected influences and bridge expected influences assessed via case-dropping bootstrap.

Figure S4. Bootstrapped confidence intervals of edge weights.

Figure S5. Bootstrapped confidence intervals of node bridge expected influences.

Figure S6. Estimation of node centrality differences via bootstrapped difference tests.

Figure S7. Estimation of edge weight differences by bootstrapped difference tests.

Figure S8. Network structure invariance tests of depression-anxiety symptom networks between Transition Patterns 1 and 4 among Chinese older adults (BH correction applied).

| Table S1. Detailed coding information for intergenerational support patterns among Chinese older adults based on the original CLHLS questionnaire | | | |
| --- | --- | --- | --- |
| Dimension | Item Content | Item Abbreviation | Notes |
| Economic support | 1.What is your primary source of livelihood at present? | ES1 | Responses were coded as "yes" if children were mentioned as a source of livelihood, and "no" otherwise. |
| 2.Who primarily covers your medical expenses? | ES2 | Coded as "yes" if the response mentioned children; otherwise coded as "no". |
| 3.In the past year, how much financial or in-kind support have you received from your children (converted into monetary value in yuan)? | ES3 | To facilitate coding and eliminate the influence of absolute amounts, Z-scores were calculated based on the reported values. Responses with Z-scores above 0 were coded as "yes," and those below 0 as "no". |
| Emotional support | 4.With whom do you communicate most frequently in daily life? | EmS1 | Coded as "yes" if the response mentioned children; otherwise coded as "no". |
| 5.When you have personal concerns or thoughts, who is the first person you confide in? | EmS2 | Coded as "yes" if the response mentioned children; otherwise coded as "no". |
| Caregiving support | 6.Who do you currently live with? | CS1 | Coded as "yes" if the response mentioned children; otherwise coded as "no". |
| 7.When you feel unwell or fall ill, who primarily takes care of you? | CS2 | Coded as "yes" if the response mentioned children; otherwise coded as "no". |

**Figure S1.** Distribution of response frequencies to the seven intergenerational support items for Class 1 and Class 2 at T1 (2014) and T2 (2018).

ES1–3: Items 1 to 3 on economic support

EmS1–2: Items 1 and 2 on emotional support

CS1–2: Items 1 and 2 on caregiving support

**Figure S2.** Correlations among item scores of the CESD-10 and GAD-7 scales among Chinese older adults at T2 (2018).

| Table S2. Correlation matrix of the CESD-10 and GAD-7 items | | | | | | | | | | | | | | | | | | |
| --- | --- | --- | --- | --- | --- | --- | --- | --- | --- | --- | --- | --- | --- | --- | --- | --- | --- | --- |
|  | GAD-1 | GAD-2 | GAD-3 | GAD-4 | GAD-5 | GAD-6 | GAD-7 | CESD-1 | CESD-2 | CESD-3 | CESD-4 | CESD-5 | CESD-6 | CESD-7 | CESD-8 | CESD-9 | CESD-10 |
| GAD-1 |  |  |  |  |  |  |  |  |  |  |  |  |  |  |  |  |  |
| GAD-2 | 0.75 |  |  |  |  |  |  |  |  |  |  |  |  |  |  |  |  |
| GAD-3 | 0.66 | 0.71 |  |  |  |  |  |  |  |  |  |  |  |  |  |  |  |
| GAD-4 | 0.63 | 0.72 | 0.69 |  |  |  |  |  |  |  |  |  |  |  |  |  |  |
| GAD-5 | 0.57 | 0.62 | 0.59 | 0.67 |  |  |  |  |  |  |  |  |  |  |  |  |  |
| GAD-6 | 0.56 | 0.59 | 0.59 | 0.64 | 0.64 |  |  |  |  |  |  |  |  |  |  |  |  |
| GAD-7 | 0.55 | 0.60 | 0.56 | 0.56 | 0.55 | 0.57 |  |  |  |  |  |  |  |  |  |  |  |
| CESD-1 | 0.34 | 0.35 | 0.36 | 0.33 | 0.33 | 0.37 | 0.32 |  |  |  |  |  |  |  |  |  |  |
| CESD-2 | 0.23 | 0.19 | 0.19 | 0.16 | 0.13 | 0.15 | 0.17 | 0.21 |  |  |  |  |  |  |  |  |  |
| CESD-3 | 0.42 | 0.41 | 0.43 | 0.40 | 0.34 | 0.39 | 0.34 | 0.46 | 0.27 |  |  |  |  |  |  |  |  |
| CESD-4 | 0.30 | 0.26 | 0.29 | 0.25 | 0.21 | 0.22 | 0.18 | 0.27 | 0.41 | 0.40 |  |  |  |  |  |  |  |
| CESD-5 | 0.15 | 0.13 | 0.16 | 0.17 | 0.14 | 0.13 | 0.12 | 0.13 | 0.10 | 0.16 | 0.26 |  |  |  |  |  |  |
| CESD-6 | 0.35 | 0.36 | 0.34 | 0.38 | 0.30 | 0.27 | 0.32 | 0.29 | 0.20 | 0.38 | 0.26 | 0.15 |  |  |  |  |  |
| CESD-7 | 0.14 | 0.11 | 0.14 | 0.13 | 0.10 | 0.08 | 0.11 | 0.11 | 0.12 | 0.17 | 0.18 | 0.43 | 0.18 |  |  |  |  |
| CESD-8 | 0.25 | 0.25 | 0.26 | 0.25 | 0.20 | 0.18 | 0.19 | 0.20 | 0.18 | 0.30 | 0.31 | 0.18 | 0.30 | 0.17 |  |  |  |
| CESD-9 | 0.24 | 0.27 | 0.30 | 0.27 | 0.22 | 0.21 | 0.22 | 0.20 | 0.17 | 0.30 | 0.30 | 0.20 | 0.31 | 0.16 | 0.31 |  |  |
| CESD-10 | 0.25 | 0.20 | 0.23 | 0.20 | 0.17 | 0.19 | 0.16 | 0.20 | 0.10 | 0.21 | 0.21 | 0.25 | 0.13 | 0.23 | 0.17 | 0.14 |  |

| Table S3: The complete weighted adjacency matrix for Transition Pattern 1 (left) and Transition Pattern 4 (right) | | | | | | | | | | | | | | | | | |
| --- | --- | --- | --- | --- | --- | --- | --- | --- | --- | --- | --- | --- | --- | --- | --- | --- | --- |
|  | cesd1 | cesd2 | cesd3 | cesd4 | cesd5 | cesd6 | cesd7 | cesd8 | cesd9 | cesd10 | gad1 | gad2 | gad3 | gad4 | gad5 | gad6 | gad7 |
| cesd1 |  | 0.040 | 0.261 | 0.084 | 0.000 | 0.010 | 0.000 | 0.000 | 0.000 | 0.058 | 0.000 | 0.000 | 0.062 | 0.000 | 0.022 | 0.139 | 0.000 |
| cesd2 | 0.069 |  | 0.068 | 0.270 | 0.000 | 0.095 | 0.020 | 0.012 | 0.000 | 0.000 | 0.018 | 0.000 | 0.030 | 0.000 | 0.000 | 0.000 | 0.000 |
| cesd3 | 0.287 | 0.073 |  | 0.114 | 0.008 | 0.169 | 0.035 | 0.099 | 0.067 | 0.004 | 0.000 | 0.019 | 0.096 | 0.042 | 0.000 | 0.002 | 0.000 |
| cesd4 | 0.024 | 0.329 | 0.116 |  | 0.098 | 0.003 | 0.000 | 0.079 | 0.103 | 0.044 | 0.041 | 0.000 | 0.025 | 0.004 | 0.022 | 0.000 | 0.000 |
| cesd5 | 0.000 | 0.000 | 0.000 | 0.102 |  | 0.000 | 0.341 | 0.052 | 0.109 | 0.111 | 0.020 | 0.000 | 0.000 | 0.000 | 0.000 | 0.000 | 0.000 |
| cesd6 | 0.100 | 0.000 | 0.115 | 0.029 | 0.000 |  | 0.051 | 0.076 | 0.165 | 0.000 | 0.093 | 0.010 | 0.000 | 0.066 | 0.006 | 0.000 | 0.054 |
| cesd7 | 0.000 | 0.083 | 0.016 | 0.017 | 0.355 | 0.047 |  | 0.055 | 0.011 | 0.102 | 0.006 | 0.000 | 0.017 | 0.000 | 0.000 | 0.000 | 0.000 |
| cesd8 | 0.025 | 0.023 | 0.055 | 0.163 | 0.044 | 0.096 | 0.031 |  | 0.137 | 0.000 | 0.069 | 0.035 | 0.000 | 0.000 | 0.000 | 0.000 | 0.000 |
| cesd9 | 0.000 | 0.051 | 0.097 | 0.074 | 0.064 | 0.175 | 0.038 | 0.161 |  | 0.000 | 0.000 | 0.000 | 0.050 | 0.060 | 0.000 | 0.000 | 0.000 |
| cesd10 | 0.038 | 0.000 | 0.040 | 0.068 | 0.121 | 0.000 | 0.085 | 0.064 | 0.006 |  | 0.078 | 0.000 | 0.022 | 0.000 | 0.000 | 0.002 | 0.000 |
| gad1 | 0.029 | 0.050 | 0.063 | 0.040 | -0.004 | 0.016 | 0.000 | 0.000 | 0.000 | 0.067 |  | 0.301 | 0.198 | 0.040 | 0.057 | 0.100 | 0.034 |
| gad2 | 0.018 | 0.000 | 0.046 | 0.000 | 0.000 | 0.032 | 0.000 | 0.000 | 0.027 | 0.000 | 0.344 |  | 0.128 | 0.213 | 0.109 | 0.051 | 0.186 |
| gad3 | 0.076 | 0.000 | 0.000 | 0.006 | 0.000 | 0.000 | 0.000 | 0.034 | 0.004 | 0.037 | 0.198 | 0.223 |  | 0.261 | 0.000 | 0.092 | 0.170 |
| gad4 | 0.000 | 0.000 | 0.001 | 0.000 | 0.023 | 0.083 | 0.000 | 0.000 | 0.021 | 0.000 | 0.068 | 0.247 | 0.164 |  | 0.206 | 0.107 | 0.131 |
| gad5 | 0.000 | 0.000 | 0.000 | 0.000 | 0.000 | 0.000 | 0.000 | 0.000 | 0.000 | 0.003 | 0.000 | 0.027 | 0.160 | 0.265 |  | 0.262 | 0.103 |
| gad6 | 0.043 | -0.037 | 0.032 | 0.000 | 0.000 | -0.010 | -0.023 | 0.000 | 0.008 | 0.028 | 0.056 | 0.030 | 0.088 | 0.193 | 0.270 |  | 0.077 |
| gad7 | 0.050 | 0.000 | 0.012 | 0.000 | 0.023 | 0.057 | 0.000 | 0.000 | 0.009 | 0.000 | 0.087 | 0.157 | 0.014 | 0.021 | 0.169 | 0.183 |  |
| Transition Pattern 1: Chinese older adults maintained a High Emotional Support pattern at both time points in 2014 and 2018. Transition Pattern 4: Chinese older adults maintained a Low Overall Support pattern at both time points in 2014 and 2018. | | | | | | | | | | | | | | | | | |

**Figure S3.** Stability of node expected influences and bridge expected influences assessed via case-dropping bootstrap

Left. Bootstrapped stability of node expected influences and bridge expected influences in the symptom network of older adults with Transition Pattern 1

Right. Bootstrapped stability of node expected influences and bridge expected influences in the symptom network of older adults with Transition Pattern 4

**Figure S4.** Bootstrapped confidence intervals of edge weights

A. Bootstrapped 95% confidence intervals for edge weights in the symptom network of older adults with Transition Pattern 1.

B. Bootstrapped 95% confidence intervals for edge weights in the symptom network of older adults with Transition Pattern 4.

Black dots represent the estimated edge weights, ordered from highest to lowest. The gray bands indicate the 95% confidence intervals of the edge weights. Wider intervals suggest lower stability, while narrower intervals indicate greater stability.

**Figure S5.** Bootstrapped confidence intervals of node bridge expected influences

A. Bootstrapped 95% confidence intervals for node bridge expected influences in the symptom network of older adults with Transition Pattern 1

B. Bootstrapped 95% confidence intervals for node bridge expected influences in the symptom network of older adults with Transition Pattern 4

Black dots represent the estimated node bridge expected influences, arranged according to the item order of the CESD and GAD scales. The gray bands indicate the 95% confidence intervals. Wider intervals suggest lower stability, whereas narrower intervals indicate greater stability.

**Figure S6.** Estimation of node centrality differences via bootstrapped difference tests

A. Transition Pattern 1

B. Transition Pattern 4

Bootstrapped difference tests of node centrality within each symptom network. Gray boxes indicate node pairs that do not significantly differ from each other, while black boxes indicate significant differences (α = 0.05).

**Figure S7.** Estimation of edge weight differences by bootstrapped difference tests

A. Transition Pattern 1

B. Transition Pattern 4

Bootstrapped difference tests of edge weight within each symptom network. Gray boxes indicate edge weight pairs that do not significantly differ from each other, while black boxes indicate significant differences (α = 0.05).

**Figure S8. Network structure invariance tests of depression-anxiety symptom networks between Transition Patterns 1 and 4 among Chinese older adults (BH correction applied)
A.** Bootstrapped difference in global network strength between Transition Pattern 1 and Transition Pattern 4. The difference was statistically significant (Transition Pattern 1: 6.89; Transition Pattern 4: 7.25; Strength difference S = 0.36, *p* = 0.036).
**B.** Permutation tests for edge weight invariance. BH-corrected p-values for all edge comparisons were > 0.05, indicating no significant differences. The bootstrapped maximum edge weight difference across 1000 permutations was not statistically significant (M = 0.16, *p* = 0.523).
